# Supplementary material
Source: publisher site journal article supplement (https://www.spandidos-publications.com/8594/downloadSupplementary)

Figure S1. Association between NCAPH expression level and Tregs in endometrial cancer through the CIBERSORT-absolute and XCELL methods. NCAPH, non-SMC condensin I complex subunit H; TPM, transcripts per million; Tregs, T regulatory cells.

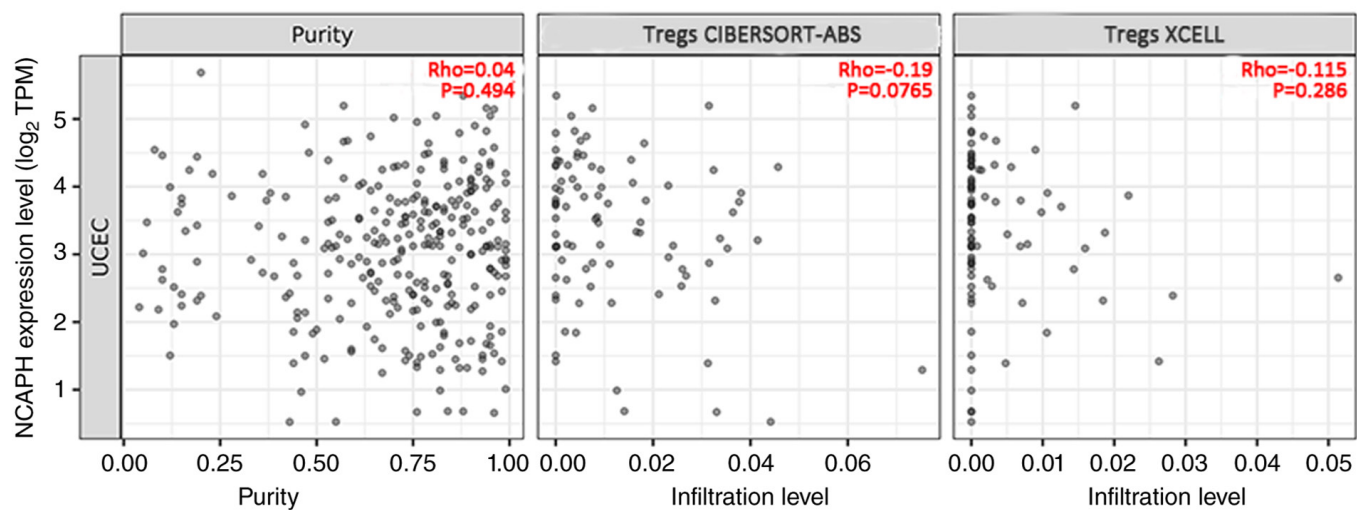

Supplement: Supplementary file 1 [file downloadSupplementary]
